## Propofol anaesthesia and postoperative nausea and vomiting: quantitative systematic review of randomized controlled studies

M. TRAMÈR, A. MOORE AND H. MCQUAY

### Summary

We have analysed randomized controlled studies which reported the incidence of postoperative nausea and vomiting (PONV) after propofol anaesthesia compared with other anaesthetics (control). Cumulative data of early (0–6 h) and late (0–48 h) PONV were recorded as occurrence or non-occurrence of nausea or vomiting. Combined odds ratio and number-needed-to-treat were calculated for propofol as an induction or maintenance regimen, early or late outcomes, and different emetic events. This was performed for all control event rates and within a range of 20–60% control event rates. We analysed 84 studies involving 6069 patients. The effect of propofol on PONV was dependent mainly on the method of administration, time of measurement and range of control event rates. When all studies were included the number-needed-to-treat to prevent PONV with propofol was more than 9 when used for induction of anaesthesia and at best 6 when used for maintenance. Within the 20–60% control event rate range, best results were achieved with propofol maintenance to prevent early PONV: the number-needed-to-treat to prevent early nausea was 4.7 (95% confidence interval 3.8–6.3), vomiting 4.9 (4–6.1) and any emetic event 4.9 (3.7–7.1). Within the 20–60% control event rate, of five patients treated with propofol for maintenance of anaesthesia, one will not vomit or be nauseated in the immediate postoperative period who would otherwise have vomited or been nauseated. This may be clinically relevant. In all other situations the difference between propofol and control may have reached statistical significance but was of doubtful clinical relevance. Treatment efficacy should be established within a defined range of control event rates for meaningful estimates of efficacy and for comparisons. (*Br. J. Anaesth.* 1997; **78**: 247–255).

### Key words

Anaesthetics i.v., propofol. Vomiting, nausea. Vomiting, antiemetics. Vomiting, incidence. Statistics.

Propofol is thought to be antiemetic and therefore useful to decrease the incidence of postoperative nausea and vomiting (PONV).<sup>1–3</sup> However, the mechanism of its effect on PONV is obscure. Interpretations range from propofol being less

emetogenic than other anaesthetics<sup>4</sup> to being directly antiemetic.<sup>2</sup> When given in subanaesthetic doses after surgery either as prophylaxis<sup>5,6</sup> or as treatment,<sup>2</sup> results were contradictory.

A biological basis for propofol being an antiemetic is lacking. In animals, propofol did not interact strongly with dopamine D2 receptors<sup>7</sup> and in human volunteers subhypnotic doses of propofol did not prevent vomiting induced by the dopamine agonist apomorphine.<sup>8</sup> These data make it unlikely that propofol has a significant antiemetic effect via dopamine receptors.<sup>9</sup> Results from *in vitro* studies were inconclusive.<sup>10,11</sup> One *in vitro* model suggested that propofol had little or no effect on endogenous 5-HT<sub>3</sub> receptors while volatile anaesthetics enhanced 5-HT<sub>3</sub> receptor-mediated currents.<sup>10</sup> This may be indirect evidence that propofol has less emetogenic potency than other anaesthetics.<sup>10</sup> In another *in vitro* study propofol was shown to be a potent 5-HT<sub>3</sub> receptor blocker.<sup>11</sup> However, in this experiment all of the general anaesthetics examined caused concentration-dependent inhibition of the 5-HT<sub>3</sub> channel.<sup>11</sup> Other vague theoretical mechanisms of propofol and antiemesis include direct depressant action on the chemoreceptor trigger zone, vagal nuclei and other centres implicated in nausea and vomiting,<sup>7</sup> or modulation of some subcortical pathways.<sup>2</sup> Although documented anecdotally, propofol-induced improvement of mood and well-being could not be reproduced in a randomized experimental human study.<sup>12</sup>

The evidence is that propofol has only a minimal effect on vomiting in paediatric strabismus surgery, a clinical situation with a particularly high risk of PONV.<sup>13</sup> The aim of this meta-analysis was therefore to test the evidence that propofol, when used for induction or maintenance of anaesthesia, decreases the incidence of PONV compared with other anaesthetic techniques.

### Methods

MEDLINE (Knowledge Server v3.25) was searched (1981 to December 1995) for randomized

MARTIN TRAMÈR, MD, ANDREW MOORE, DPHIL, HENRY MCQUAY, DM, Pain Research, Nuffield Department of Anaesthetics, The Churchill, Oxford Radcliffe Hospital, Headington, Oxford OX3 7LJ. Accepted for publication: November 18, 1996.

Correspondence to: M. T.

controlled studies which evaluated the effect of propofol compared with other anaesthetics (control) on PONV and reported the outcome in dichotomous form (number of patients with and without an outcome). The search strategy was not restricted to the English language and used combinations of the free text terms emesis, nausea, vomiting, adverse effects (subheading), and propofol, Disoprivan, Diprivan, Disopropofol or ICI35868. Additional reports were identified from reference lists of retrieved reports and from review articles of PONV and propofol. Unpublished studies were not sought. Abstracts were not considered. Reports without randomization or with an inadequate method of randomization (such as patient's date of birth) were excluded from analysis.

Information on patients, anaesthetics, surgery and definition of PONV was obtained from each report. Three different PONV outcomes were extracted in dichotomous form: nausea, vomiting (including retching), and any emetic event (nausea, vomiting or nausea and vomiting). These outcomes were treated separately as "emetic events". Incidences of early (0–6 h) and late (0–48 h) emetic events were extracted. Thus a maximum of three different emetic events could be extracted from each study, both early and late. When several incidences of events were reported at different times the cumulative values nearest to 6 and 48 h after operation were analysed. Emetic events "during recovery" or "after operation" were considered as early data. No weighting was used for different grades of nausea, number of vomiting episodes, time to first vomiting episode, number of patients needing antiemetic rescue medication, delay until discharge or scores of patient satisfaction.

When propofol was used only for induction it was compared with other i.v. or inhalation induction techniques. Propofol as a maintenance anaesthetic was compared with other maintenance regimens. When multiple comparisons were possible between propofol and several other anaesthetics in one study, only one control arm was analysed. The primary choice for control was, for induction, another i.v. agent and for maintenance, an inhalation method. Comparisons where propofol was used as an induction agent in both active and control groups were excluded. Comparisons between a nitrous oxide-free propofol arm (total i.v. anaesthesia) and a nitrous oxide-based control arm were not considered because of the potential effect of nitrous oxide on emesis.<sup>14</sup> However, studies were analysed when nitrous oxide was omitted in both the propofol and control arms.

The plot of L'Abbé, Detsky and O'Rourke<sup>15</sup> of event rates with propofol compared with control event rates was used as a graphical means of exploring the efficacy of propofol and homogeneity of the data set. A scatter predominantly lying between the line of equality and the control axis suggested efficacy with propofol and homogeneity.

Statistical significance and clinical relevance of the efficacy of propofol were evaluated using odds ratio and number-needed-to-treat (NNT)<sup>16</sup> methods. Odds ratio estimates were calculated with 95% confidence intervals (95% CI) using a fixed effects

model.<sup>17</sup> Point estimates and 95% CI of the NNT were calculated.<sup>18</sup> The NNT indicated how many patients had to be exposed to propofol in order to prevent one particular emetic event in one of them, who would have had this emetic outcome with a control treatment (that is, with another anaesthetic).

Efficacy was defined as absence of an emetic event. The efficacy of propofol was analysed separately for different modes of administration (induction, maintenance), different times (early, late emetic events) and different emetic events (nausea, retching/vomiting, any emetic event). This was done by combining single propofol or control arms both independent of control event rates (i.e. for all incidences of emetic events with control anaesthetics) and within a range of 20–60% control event rates (i.e. after exclusion of all data from studies with a control event rate less than 20% or greater than 60%). This range of control event rates was a *post hoc* definition.

Absence of a statistically significant improvement of propofol over control was assumed when the lower 95% confidence limit of the odds ratio was <1 or when the NNT point estimate was either negative or its upper 95% confidence limit included no effect (an infinite NNT). For simplification, only NNT with 95% CI are shown. Our arbitrary definition of a clinically relevant effect for prophylaxis of PONV was an NNT ≤5. An NNT of 5 would be the best estimate of efficacy which could be achieved with a control event rate of 20%.

Calculations were performed using Excel v 4.0 on a Power Macintosh 7100/66. Tables with data extracted from the analysed reports, including odds ratios with confidence limits, are available from the world-wide-web (<http://www.jr2.ox.ac.uk/Bandolier/painres/propoponv.html>).

## Results

We considered 122 reports for analysis; 19 were excluded because propofol was used for induction in the control group (11 studies) and/or because nitrous oxide was omitted in the propofol but not in the control group (eight studies) and no other comparisons were possible. Another 19 studies were excluded for various reasons; six were not randomized,<sup>19–24</sup> the randomization method was inadequate in four,<sup>25–28</sup> the technique of maintenance was not mentioned in two,<sup>29,30</sup> three were not adequately controlled (opioid or droperidol only in one group),<sup>31–33</sup> one had eltanolone as the only control arm<sup>34</sup> and data from three studies were published twice.<sup>35–40</sup>

Data from 84 randomized controlled studies involving 6069 patients (3098 treated with propofol) were analysed. A list of these references is given in the appendix. Median group size was 22 (range 10–75) patients. Thirty-one (37%) studies were sponsored by the manufacturer of propofol. Propofol as an induction agent or as a maintenance regimen was compared with other anaesthetic techniques in a large variety of surgical settings in children and adults. Maintenance of anaesthesia with propofol included induction with propofol or an initial bolus of propofol in all studies.

**Table 1** One control arm per emetic outcome and study. Nausea, vomiting (including retching), and any emetic event (nausea, vomiting, or nausea and vomiting) may be reported in one study. \*(a) and (c) = number of patients in whom the event was absent; (b) and (d) = the total number of patients in the listed studies. Control event rate = Incidence of emetic outcomes in control group; CI = confidence interval; n/a = not applicable. Early events = 0–6 h; late events = 0–48 h; ∞ = infinity (negative value, indicating absence of a statistically significant difference between propofol and control). Odds ratios with 95% confidence limits are available from the internet (<http://www.jr2.ox.ac.uk/Bandolier/painers/propconv.html>)

| Event                                        | All control event rates |                   |                                              |                                                                    | 20–60% control event rates |                   |                                              |                                                                                                   |
|----------------------------------------------|-------------------------|-------------------|----------------------------------------------|--------------------------------------------------------------------|----------------------------|-------------------|----------------------------------------------|---------------------------------------------------------------------------------------------------|
|                                              | Absence of given events |                   | Number-needed-to-treat                       |                                                                    | Absence of given events    |                   | Number-needed-to-treat                       |                                                                                                   |
|                                              | With propofol a/b*      | With control c/d* | (95% CI) the event with propofol 1/(c/d-a/b) | Reference                                                          | With propofol a/b*         | With control c/d* | (95% CI) the event with propofol 1/(c/d-a/b) | Reference                                                                                         |
| <b>Propofol for induction—early events</b>   |                         |                   |                                              |                                                                    |                            |                   |                                              |                                                                                                   |
| Nausea                                       | 308/354                 | 269/353           | 9.3 (6.1–19.4)                               | [65–77]                                                            | 42/63                      | 29/62             | 5.0 (2.7–35)                                 | [68], [77]                                                                                        |
| Vomiting                                     | 360/415                 | 329/414           | 13.7 (8.1–45.4)                              | [65–68], [70–81]                                                   | 161/197                    | 133/197           | 7.0 (4.4–17)                                 | [67], [68], [75–80]                                                                               |
| Any event                                    | 183/217                 | 175/220           | 20.9 (8.3–∞)                                 | [36], [82–87]                                                      | 61/77                      | 60/83             | 14 (5.0–∞)                                   | [83], [86]                                                                                        |
| <b>Propofol for induction—late events</b>    |                         |                   |                                              |                                                                    |                            |                   |                                              |                                                                                                   |
| Nausea                                       | 81/101                  | 79/101            | 50.1 (7.6–∞)                                 | [73], [76], [80], [88]                                             | 48/65                      | 45/64             | 28 (5.3–∞)                                   | [73], [80], [88]                                                                                  |
| Vomiting                                     | 107/130                 | 99/131            | 14.9 (6–∞)                                   | [73], [76], [88–90]                                                | 62/81                      | 54/81             | 10 (4.2–∞)                                   | [73], [76], [88]                                                                                  |
| Any event                                    | no data                 | no data           | n/a                                          |                                                                    | no data                    | no data           | n/a                                          |                                                                                                   |
| <b>Propofol for maintenance—early events</b> |                         |                   |                                              |                                                                    |                            |                   |                                              |                                                                                                   |
| Nausea                                       | 945/1064                | 790/1035          | 8 (6.4–10.8)                                 | [40], [42–50], [53–56], [68], [73], [75], [77], [91–102]           | 418/507                    | 310/506           | 4.7 (3.8–6.3)                                | [40], [42], [47], [50], [53–56], [68], [77], [91], [93–95], [97–100], [102]                       |
| Vomiting                                     | 1273/1339               | 1098/1304         | 9.2 (7.6–11.7)                               | [4], [38], [40–56], [68], [73], [75], [77–79], [93–99], [102–108]  | 559/608                    | 410/575           | 4.9 (4.0–6.1)                                | [4], [40], [41], [43], [51–56], [68], [75], [77–79], [94], [95], [97], [102], [103], [107], [108] |
| Any event                                    | 399/440                 | 311/417           | 6.2 (4.7–9)                                  | [1], [82], [83], [87], [109–119]                                   | 237/263                    | 187/269           | 4.9 (3.7–7.1)                                | [1], [83], [110], [112], [114], [116–119]                                                         |
| <b>Propofol for maintenance—late events</b>  |                         |                   |                                              |                                                                    |                            |                   |                                              |                                                                                                   |
| Nausea                                       | 209/228                 | 171/230           | 5.8 (4.2–9.4)                                | [38], [73], [88], [96], [102], [120–123]                           | 117/133                    | 96/134            | 6.1 (3.9–14.5)                               | [73], [88], [121], [122]                                                                          |
| Vomiting                                     | 277/346                 | 245/349           | 10.1 (6.2–28.8)                              | [4], [38], [73], [88], [96], [102], [107], [108], [120], [122–125] | 165/217                    | 140/219           | 8.3 (4.9–28)                                 | [4], [73], [88], [102], [107], [108], [122]                                                       |
| Any event                                    | 64/70                   | 57/70             | 10 (4.7–∞)                                   | [126], [127]                                                       | 44/50                      | 37/50             | 7.1 (3.4–∞)                                  | [126], [127]                                                                                      |

The event rate scatters (fig. 1) suggested improvement with propofol over control mainly for early outcomes when propofol was used for maintenance, and also suggested homogeneity for all data sets. The mean control event rate (incidence of PONV in controls) was 22% (range 0% to almost 70%). For all 84 randomized controlled studies a total of 169 different control event rates (nausea, vomiting or any emetic event) were reported; 77 (46% of all reported events) had an incidence less than 20% and six (4%) an incidence of more than 60%.

COMBINED ANALYSIS FOR ALL CONTROL EVENT RATES (TABLE 1)

For all control event rates the combined analysis indicated statistically significant results (NNT confidence interval excluding infinity) in favour of propofol for all three PONV outcomes only when propofol was used as a maintenance regimen and

only when early events were analysed. Under these conditions, 11–16% of patients (NNT 6.2 for absence of any emetic event, 8 for absence of nausea and 9.2 for absence of vomiting) undergoing propofol anaesthesia will not have an emetic event in the early postoperative period, who would have vomited or been nauseated with another anaesthetic.

When early and late outcomes after propofol as an induction agent or late outcomes after propofol maintenance were analysed, the combined NNT for all control event rates was always greater than 9 and, except for late absence of nausea after propofol maintenance, sometimes propofol was not significantly different from control.

ANALYSIS WITHIN THE RANGE OF 20–60% CONTROL EVENT RATES (TABLE 1, FIG. 1)

Within the 20–60% range of control event rates, the mean incidence of early and late PONV in controls

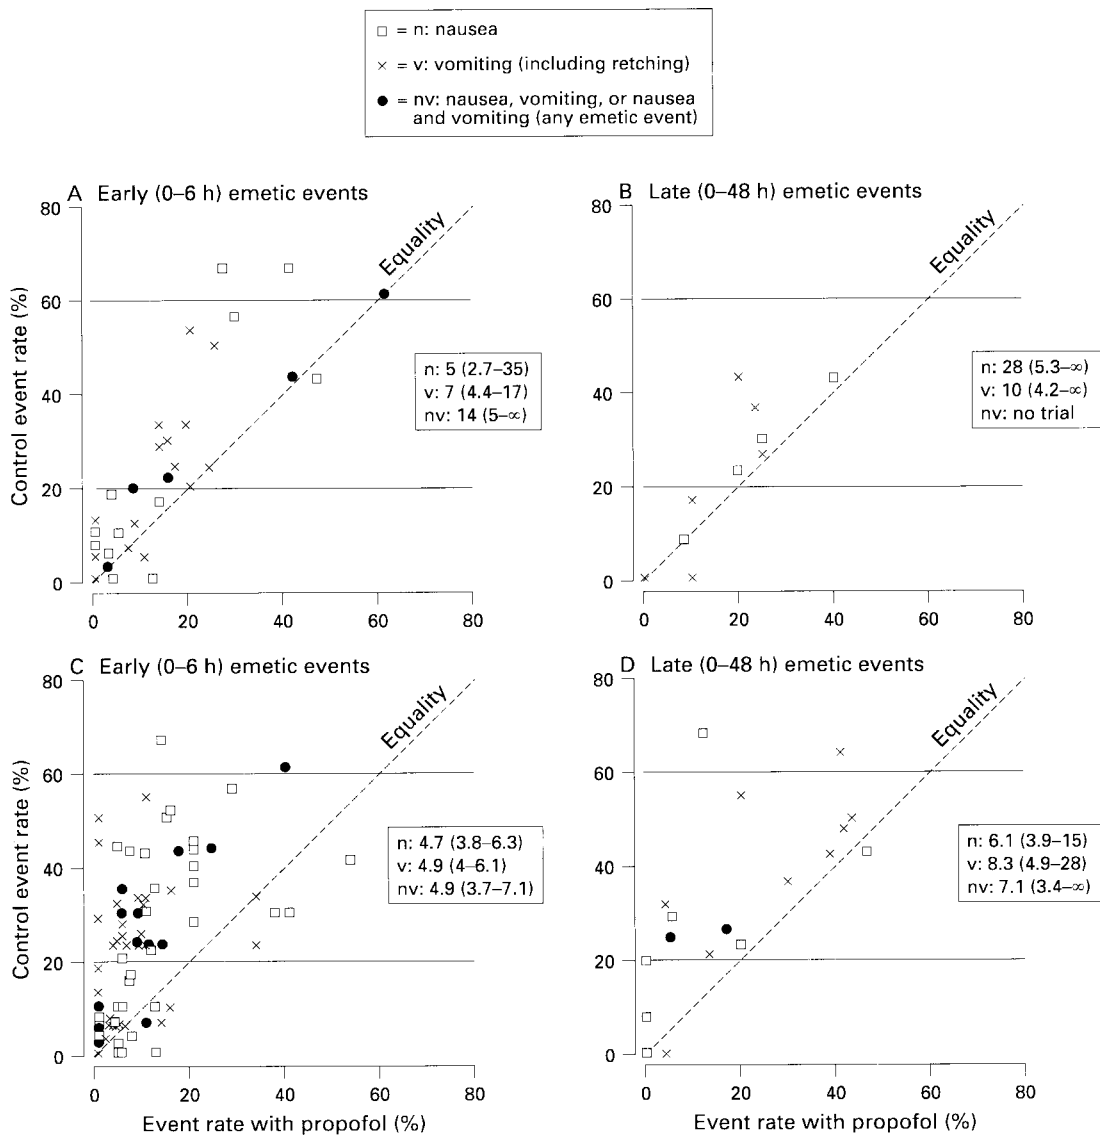

Figure 1 Early (A, C) and late (B, D) emetic event rates with propofol for induction (A, B) and maintenance (C, D) of anaesthesia compared with other anaesthetics (control). Three different emetic events (see key), both early and late, may be from one study. Only one control arm per study is considered. Horizontal lines indicate a range of control event rates of 20–60%. Values are number-needed-to-treat (95% confidence interval) to prevent an emetic event with propofol within this range. ∞=infinity (absence of a statistically significant difference between propofol and control).

was 36% and 32% when propofol was used for induction, and 33% for both times when propofol was used for maintenance.

Propofol induction (fig. 1A, B) was significantly better than control for absence of both early nausea and vomiting (NNT 5 and 6.7, respectively, each with wide confidence intervals). Absence of any emetic event in the early postoperative period after propofol induction was not significantly different from control. Late outcomes after propofol induction were either not significantly different from control or there were no studies reporting this outcome.

Propofol as a maintenance regimen (fig. 1C, D) was significantly better than control for all early emetic events; point estimates of the NNT to prevent early nausea, vomiting and any emetic event were approximately 5, with confidence intervals ranging from 4 to 7. Prevention of late vomiting and nausea with a propofol maintenance regimen had an NNT of approximately 8 and 6, respectively, both with wide confidence intervals, whereas prevention of late combined emetic events was not significantly different from control.

#### SUBGROUP ANALYSIS: TWO DIFFERENT SURGICAL SETTINGS

In 11 studies, propofol maintenance was compared with other anaesthetics in more than 1000 patients undergoing minor gynaecological surgery (abortion, curettage).<sup>41–51</sup> The mean incidence of early vomiting without propofol was 10%; the NNT to prevent early vomiting with propofol was 16 (11–32).

In five studies of 200 patients undergoing major gynaecological surgery, including hysterectomy and laparoscopy,<sup>52–56</sup> the mean incidence of early vomiting in controls was 32%; the NNT to prevent early vomiting with a propofol maintenance regimen compared with other anaesthetics was 4.2 (3–8).

## Discussion

Two of the most recent comprehensive review articles on propofol stated that a significant decrease in PONV was observed with the use of propofol for anaesthesia,<sup>57</sup> and that an increasing body of literature supported the antiemetic activity of propofol.<sup>3</sup> However, very few review articles use valid methods to identify, assess and synthesize information.<sup>58</sup>

The main steps in our approach to propofol and PONV were to identify data systematically and without bias, to define homogeneous subgroups of clinical interest and to use quantitative methods of analysis which allowed sensible statistical and clinical conclusions to be drawn. Further, an arbitrary range of control event rates, excluding studies with very low or very high PONV incidences, enabled analysis of treatment efficacy within a set of data from studies with clinical validity. The lower boundary (control event rate 20%) was set because antiemetic prophylaxis was not considered to be worthwhile when the event rate without treatment was less than 20%. Moreover, in such a setting there would not be enough nausea or vomiting to allow sensitive assay of treatment efficacy. The upper

boundary (control event rate 60%) was set because a study which reported an incidence of nausea or vomiting in controls of more than 60% could not be considered as representative of clinical routine. Although a high incidence of vomiting may be reported in particular settings, such as paediatric strabismus surgery,<sup>13</sup> this cannot be regarded as a representative cross-section of clinical reality. Audit has shown that the mean incidence of nausea and vomiting across different surgical settings is approximately 20–40%.<sup>59–62</sup> When control event rates extend beyond this any intervention may become more or less effective and confound the combined results of a meta-analysis.

Within the 20–60% range, mean PONV incidences in controls were similar for early and late outcomes, and for propofol as an induction agent and maintenance regimen. Comparisons of efficacy could, therefore, be made between forms of administration (induction *vs* maintenance) and times (early *vs* late outcomes) without the danger of confounding the results because of different levels of control event rates.

What are the clinically relevant results of this meta-analysis? First, propofol anaesthesia should not be regarded as a universal prophylactic antiemetic if used non-selectively; too many patients would have to be treated with propofol in order to prevent PONV in one of them. A large number of studies and patients in a great variety of clinical settings were analysed; the risk of emetic outcomes without propofol when all studies were included was approximately 22%. This indicates that the data set was a representative cross-section of clinical routine rather than a selected subgroup of high-risk settings. Combined analyses for this data set, regardless of the control event rates, showed a clinically negligible effect of propofol on PONV compared with controls (number-needed-to-treat > 5) and sometimes the difference was not statistically significant. These results suggest that it may be inappropriate to expect a beneficial effect of propofol on PONV in every clinical situation.

Second, within the restricted range of control event rates (20–60%) propofol may decrease the incidence of PONV to a clinically relevant extent, but only when given as a maintenance regimen and only in the first few hours after surgery. Even in this setting five patients have to be treated with propofol to prevent early nausea or vomiting in one of them, who would have vomited or been nauseated with another anaesthetic. For late PONV this degree of benefit was lost; despite the same mean control event rate, point estimates of the NNT were higher than for early outcomes and confidence intervals were wide or included no benefit. These results suggest that propofol, when used for maintenance of anaesthesia, may produce a short-lived 20% reduction in vomiting and nauseated patients in a high-risk setting for emesis (i.e. control event rate 20–60%). These results also suggest that the effect of propofol on PONV does not influence long-term patient comfort. It is interesting to note in this connection that late emetic outcomes, although of undoubted importance,<sup>63</sup> were documented in only approximately

25–30% as many patients as early outcomes. This may be because of several factors. Anaesthetists may not be interested in late outcomes and may avoid the increased effort which is needed for prolonged follow-up of patients.

Third, although there is no way from our model to predict an individual patient's outcome with propofol, it may be possible to identify clinical subgroups with higher event rates and a corresponding greater efficacy with propofol. This was shown for paediatric strabismus surgery<sup>13</sup> and confirmed in this study, because women undergoing major gynaecological interventions were much more likely to profit from the effect of propofol on PONV than those undergoing minor gynaecological surgery. Subgroup analysis may enable more rational decision making on how and when to use propofol in a particular group of patients to optimize any potential effect on PONV. This subgroup analysis also demonstrated that it is possible to identify clinical settings where a beneficial effect of propofol on PONV is unlikely.

Fourth, although suggested recently,<sup>64</sup> propofol as an induction agent cannot be regarded as worthwhile prophylaxis for PONV. The efficacy of propofol was either inconsistent or clinically irrelevant for early outcomes and not significantly different from control for late outcomes.

In conclusion, based on data from all published randomized, controlled studies there is evidence that propofol may have a clinically relevant effect on PONV, but only in the short term, when given as a maintenance regimen and when the event rate without prophylaxis is more than 20%. In all other situations—propofol for induction, late outcomes, low control event rates—the difference between propofol and control may be statistically significant but is clinically unimportant. It is over optimistic to expect propofol to act as an antiemetic in every clinical setting, especially if the event rate without prophylaxis is low.

## Acknowledgements

M.T. holds an Overseas Research Student Award. The review was funded by Pain Research Funds.

## References

- McCollum JS, Milligan KR, Dundee JW. The antiemetic action of propofol. *Anaesthesia* 1988; **43**: 239–240.
- Borgeat A, Wilder-Smith OH, Saiah M, Rifat K. Subhypnotic doses of propofol possess direct antiemetic properties. *Anesthesia and Analgesia* 1992; **74**: 539–541.
- Smith I, White PF, Nathanson M, Gouldson R. Propofol. An update on its clinical use. *Anesthesiology* 1994; **81**: 1005–1043.
- Watcha MF, Simeon RM, White PF, Stevens JL. Effect of propofol on the incidence of postoperative vomiting after strabismus surgery in pediatric outpatients. *Anesthesiology* 1991; **75**: 204–209.
- Campbell NN, Thomas AD. Does propofol have an antiemetic effect? A prospective study of the anti-emetic effect of propofol following laparoscopy. *Anaesthesia and Intensive Care* 1991; **19**: 385–387.
- Montgomery JE, Sutherland CJ, Kestin IG, Sneyd JR. Infusions of subhypnotic doses of propofol for the prevention of postoperative nausea and vomiting. *Anaesthesia* 1996; **51**: 554–557.
- Appadu BL, Strange PG, Lambert DG. Does propofol interact with D<sub>2</sub> dopamine receptors? *Anesthesia and Analgesia* 1994; **79**: 1191–1192.
- Hvarfner A, Hammars B, Thörn SE, Wattwil M. The influence of propofol on vomiting induced by apomorphine. *Anesthesia and Analgesia* 1995; **80**: 967–969.
- Di Florio T. Is propofol a dopamine antagonist? *Anesthesia and Analgesia* 1993; **77**: 201.
- Machu TK, Harris RA. Alcohols and anesthetics enhance the function of 5-hydroxytryptamine<sub>3</sub> receptors expressed in *Xenopus laevis* oocytes. *Journal of Pharmacology and Experimental Therapeutics* 1994; **271**: 898–905.
- Barann M, Göthert M, Fink K, Bönisch H. Inhibition by anaesthetics of 14C-guanidinium flux through the voltage-gated sodium channel and the cation channel of the 5-HT<sub>3</sub> receptor of N1E-115 neuroblastoma cells. *Naumyn-Schmiedeberg's Archives of Pharmacology* 1993; **347**: 125–132.
- Whitehead C, Sanders LD, Oldroyd G, Haynes TK, Marshall RW, Rosen M, Robinson JO. The subjective effects of low-dose propofol. A double-blind study to evaluate dimensions of sedation and consciousness with low-dose propofol. *Anaesthesia* 1994; **49**: 490–496.
- Tramèr M, Moore A, McQuay H. Prevention of vomiting after paediatric strabismus surgery: a systematic review using the numbers-needed-to-treat method. *British Journal of Anaesthesia* 1995; **75**: 556–561.
- Tramèr M, Moore A, McQuay H. Omitting nitrous oxide in general anaesthesia: meta-analysis of intraoperative awareness and postoperative emesis in randomized controlled trials. *British Journal of Anaesthesia* 1996; **76**: 186–193.
- L'Abbé K, Detsky AS, O'Rourke K. Meta-analysis in clinical research. *Annals of Internal Medicine* 1987; **107**: 224–233.
- Laupacis A, Sackett DL, Roberts RS. An assessment of clinically useful measures of the consequences of treatment. *New England Journal of Medicine* 1988; **318**: 1728–1733.
- Gardner MJ, Altman DG, eds. *Statistics with Confidence*. London: British Medical Journal, 1989.
- Cook RJ, Sackett DL. The number needed to treat: a clinically useful measure of treatment effect. *British Medical Journal* 1995; **310**: 452–454.
- Cundy JM, Arunasalam K. Use of an emulsion formulation of propofol ('Diprivan') in intravenous anaesthesia for termination of pregnancy. A comparison with methohexitone. *Postgraduate Medical Journal* 1985; **61** (Suppl.3): 129–131.
- Hartung E, Freye E. An open comparison of propofol and enflurane for prolonged abdominal surgery. *Anaesthesia* 1988; **43** (Suppl.): 105–107.
- Kay NH, Uppington J, Sear JW, Alien MC. Use of an emulsion of ICI 35868 (propofol) for the induction and maintenance of anaesthesia. *British Journal of Anaesthesia* 1985; **57**: 736–742.
- Lombard TP, Couper JL. Propofol or methohexitone for induction of anaesthesia for minor gynaecological procedures. *South African Medical Journal* 1987; **72**: 843–845.
- Mackenzie N, Grant IS. Propofol ('Diprivan') for continuous intravenous anaesthesia. A comparison with methohexitone. *Postgraduate Medical Journal* 1985; **61** (Suppl.): 70–75.
- Uppington J, Kay NH, Sear JW. Propofol ('Diprivan') as a supplement to nitrous oxide–oxygen for the maintenance of anaesthesia. *Postgraduate Medical Journal* 1985; **61** (Suppl.): 80–83.
- Cade L, Morley PT, Ross AW. Is propofol cost-effective for day-surgery patients? *Anaesthesia and Intensive Care* 1991; **19**: 201–204.
- Juhel A, Chatellier-Miras A, Toulemont PJ, Le Callonnec A, Urvoy M, Mallédant Y. Etude comparative propofol versus thiopental–halothane dans la survénue des réflexes oculocardiaques et des vomissements postopératoires lors de la chirurgie du strabisme chez l'enfant. *Cahiers d'Anesthésiologie* 1994; **42**: 571–576.
- Morton NS, Wee M, Christie G, Gray IG, Grant IS. Propofol for induction of anaesthesia in children. A comparison with thiopentone and halothane inhalational induction. *Anaesthesia* 1988; **43**: 350–355.
- Raftery S, Sherry E. Total intravenous anaesthesia with propofol and alfentanil protects against postoperative nausea and vomiting. *Canadian Journal of Anaesthesia* 1992; **39**: 37–40.
- Bonnardot JP, Maillet M, Brulé ML, Deligné P. Anesthésie ambulatoire et interruption volontaire de grossesse. Etude comparative des associations propofol–alfentanil et kétamine–

- midazolam. *Annales Françaises d'Anesthésie et de Réanimation* 1987; **6**: 297–300.
30. Ulsamer B, Doenicke A, Laschat M. Propofol im Vergleich zu Etomidat zur Narkoseeinleitung (Propofol in comparison with etomidate for the induction of anaesthesia). *Anaesthetist* 1986; **35**: 535–542.
  31. Klockgether-Radke A, Junge M, Braun U, Mühlendyck H. Einfluss von Propofol auf das Erbrechen nach Strabismusoperationen bei Kindern. *Anaesthetist* 1995; **44**: 755–760.
  32. Harke H, Schmidt K, Gretenkort P, Hommerich P, Deutschmann S, Eckes C, Hense W, Kleemann A, Rehorn W, Stöcker H, Leffers B, Blazejak J, Felix S, Fischer A, Fuhrmeister O, Gerecht A, Hackstein N, Knops H-J, Kostecka D, Ladleif H-U, Nicolas S, Olligs S, Rethage B, Schrama B, Seifert H, Staita K, Thater A, Urbanek Ch, Widdra S, v.d. Wielen R. Qualitätsvergleich von modifizierter Neurolept-, balancierter und intravenöser Anästhesie. Teil 2. Ergebnisse der Krefelder Studie 1992. *Anaesthesia* 1995; **44**: 687–694.
  33. Larsson S, Asgeirsson B, Magnusson J. Propofol–fentanyl anaesthesia compared to thiopental–halothane with special reference to recovery and vomiting after paediatric strabismus surgery. *Acta Anaesthesiologica Scandinavica* 1992; **36**: 182–186.
  34. Kallela H, Haasio J, Korttila K. Comparison of etanolone and propofol in anaesthesia for termination of pregnancy. *Anesthesia and Analgesia* 1994; **79**: 512–516.
  35. Grant IS, Mackenzie N. Recovery following propofol ('Diprivan') anaesthesia—a review of three different anaesthetic techniques. *Postgraduate Medical Journal* 1985; **61** (Suppl. 3): 133–137.
  36. Mackenzie N, Grant IS. Comparison of the new emulsion formulation of propofol with methohexitone and thiopentone for induction of anaesthesia in day cases. *British Journal of Anaesthesia* 1985; **57**: 725–731.
  37. Kay B, Hargreaves J, Sivalingham T, Healy TEJ. Intravenous anaesthesia for cystoscopy: a comparison of propofol or methohexitone with Althesin. *European Journal of Anaesthesiology* 1986; **3**: 111–120.
  38. Kay B, Healy TEJ. Propofol ('Diprivan') for outpatient cystoscopy. Efficacy and recovery compared with Althesin and methohexitone. *Postgraduate Medical Journal* 1985; **61** (Suppl. 3): 108–114.
  39. Jellish WS, Leonetti JP, Murdoch JR, Fowlers S. Propofol-based anaesthesia as compared with standard anaesthetic techniques for middle ear surgery. *Journal of Clinical Anesthesia* 1995; **7**: 292–296.
  40. Jellish WS, Leonetti JP, Murdoch JR, Fowlers S. Propofol-based anaesthesia as compared with standard anaesthetic techniques for middle ear surgery. *Otolaryngology - Head and Neck Surgery* 1995; **112**: 262–267.
  41. Boysen K, Sanchez R, Krintel JJ, Hansen M, Haar PM, Dyrberg V. Induction and recovery characteristics of propofol, thiopental and etomidate. *Acta Anaesthesiologica Scandinavica* 1989; **33**: 689–692.
  42. Boysen K, Sanchez R, Raven J, Pedersen E, Krintel JJ, Dyrberg V. Comparison of induction with and first hour of recovery from brief propofol and methohexital anaesthesia. *Acta Anaesthesiologica Scandinavica* 1990; **34**: 212–215.
  43. Edelist G. A comparison of propofol and thiopentone as induction agents in outpatient surgery. *Canadian Journal of Anaesthesia* 1987; **34**: 110–116.
  44. Jakobsson J, Oddby E, Rane K. Patient evaluation of four different combinations of intravenous anaesthetics for short outpatient procedures. *Anaesthesia* 1993; **48**: 1005–1007.
  45. Jakobsson J, Rane K. Anaesthesia for short outpatient procedures. A comparison between thiopentone and propofol in combination with fentanyl or alfentanil. *Acta Scandinavica Anaesthesiologica* 1995; **39**: 503–507.
  46. Jones DF. Recovery from day-case anaesthesia: comparison of a further four techniques including use of the new induction agent Diprivan. *British Journal of Anaesthesia* 1982; **54**: 629–633.
  47. Monedero RP, Panadero SA, Garcia-Pedrajas F, Carrera HJ, Catala BJC, Arroyo CJL. Estudio comparativo entre tiopental y propofol en anestésias de corta duración. *Revista Española Anestesiología y Reanimación* 1991; **38**: 153–155.
  48. Nalda MA, Fernández C, Hernández C, Villalonga A, Valero R. Estudio comparativo de propofol y tiopental sódico en anestésias de breve duración. *Revista Española Anestesiología y Reanimación* 1991; **38**: 146–148.
  49. Nielsen J, Jenstrup M, Gerdes NU, Rasmussen LS, Fruergaard K, Wiberg-Jørgensen F. Awakening and recovery of simple cognitive and psychomotor functions 2 h after anaesthesia for day-case surgery—total intravenous anaesthesia with propofol–alfentanil versus thiopental–alfentanil. *European Journal of Anaesthesiology* 1991; **8**: 219–227.
  50. Sanders LD, Clyburn PA, Rosen M, Robinson JO. Propofol in short gynaecological procedures. Comparison of recovery over 2 days after anaesthesia with propofol or thiopentone as sole anaesthetic agent. *Anaesthesia* 1991; **46**: 451–455.
  51. Vincent RD, Syrop CH, Van Voorhis BJ, Chestnut DH, Sparks AET, McGrath JM, Choi WW, Bates JN, Penning DH. An evaluation of the effect of anesthetic technique on reproductive success after laparoscopic pronuclear stage transfer. *Anesthesiology* 1995; **82**: 352–358.
  52. Crozier TA, Müller JE, Quittkat D, Sydow M, Wuttke W, Kettler D. Totale intravenöse Anästhesie mit Methohexital-Alfentanil oder Propofol-Alfentanil bei Unterbauchlaparotomien. Klinische Aspekte und Einfluss auf die Stressreaktion. *Anaesthetist* 1994; **43**: 594–606.
  53. Fruergaard K, Jenstrup M, Schierbeck J, Wiberg-Jørgensen F. Total intravenous anaesthesia with propofol or etomidate. *European Journal of Anaesthesiology* 1991; **8**: 385–391.
  54. Korttila K, Östman PL, Faure E, Apfelbaum JL, Ekdawi M, Roizen MF. Randomized comparison of outcome after propofol–nitrous oxide or enflurane–nitrous oxide anaesthesia in operations of long duration. *Canadian Journal of Anaesthesia* 1989; **36**: 651–657.
  55. Korttila K, Östman P, Faure E, Apfelbaum JL, Prunskis J, Ekdawi M, Roizen MF. Randomized comparison of recovery after propofol–nitrous oxide versus thiopentone–isoflurane–nitrous oxide anaesthesia in patients undergoing ambulatory surgery. *Acta Anaesthesiologica Scandinavica* 1990; **34**: 400–403.
  56. Randel GI, Levy L, Kothary SP, Pandit SK. Propofol versus thiamylal–enflurane anaesthesia for outpatient laparoscopy. *Journal of Clinical Anesthesia* 1992; **4**: 185–189.
  57. Borgeat A, Wilder-Smith OHG, Suter PM. The nonhypnotic therapeutic applications of propofol. *Anesthesiology* 1994; **80**: 642–656.
  58. Mulrow CD. The medical review article: state of the science. *Annals of Internal Medicine* 1987; **106**: 458–488.
  59. Quinn AC, Brown JH, Wallace PG, Asbury AJ. Studies in postoperative sequelae. Nausea and vomiting—still a problem. *Anaesthesia* 1994; **49**: 62–65.
  60. Rowley MP, Brown TCK. Postoperative vomiting in children. *Anaesthesia and Intensive Care* 1982; **10**: 309–313.
  61. Karlsson E, Larsson LE, Nilsson K. Postanaesthetic nausea in children. *Acta Anaesthesiologica Scandinavica* 1990; **34**: 515–518.
  62. Kermod J, Walker S, Webb I. Postoperative vomiting in children. *Anaesthesia and Intensive Care* 1995; **23**: 196–199.
  63. Carroll NV, Miederhoff P, Cox FM, Hirsch JD. Postoperative nausea and vomiting after discharge from outpatient surgery centers. *Anesthesia and Analgesia* 1995; **80**: 903–909.
  64. Myles PS, Hendrata M, Bennett AM, Langley M, Buckland MR. Postoperative nausea and vomiting. Propofol or thiopentone: does choice of induction agent affect outcome? *Anaesthesia and Intensive Care* 1996; **24**: 355–359.

## Appendix

### ANALYSED RANDOMIZED, CONTROLLED STUDIES

1. McCollum JS, Milligan KR, Dundee JW. The antiemetic action of propofol. *Anaesthesia* 1988; **43**: 239–240.
4. Watcha MF, Simeon RM, White PF, Stevens JL. Effect of propofol on the incidence of postoperative vomiting after strabismus surgery in pediatric outpatients. *Anesthesiology* 1991; **75**: 204–209.
36. Mackenzie N, Grant IS. Comparison of the new emulsion formulation of propofol with methohexitone and thiopentone

- for induction of anaesthesia in day cases. *British Journal of Anaesthesia* 1985; **57**: 725–731.
38. Kay B, Healy TEJ. Propofol ('Diprivan') for outpatient cystoscopy. Efficacy and recovery compared with Althesin and methohexitone. *Postgraduate Medical Journal* 1985; **61** (Suppl. 3): 108–114.
  40. Jellish WS, Leonetti JP, Murdoch JR, Fowlers S. Propofol-based anaesthesia as compared with standard anesthetic techniques for middle ear surgery. *Otolaryngology—Head and Neck Surgery* 1995; **112**: 262–267.
  41. Boysen K, Sanchez R, Krintel JJ, Hansen M, Haar PM, Dyrberg V. Induction and recovery characteristics of propofol, thiopental and etomidate. *Acta Anaesthesiologica Scandinavica* 1989; **33**: 689–692.
  42. Boysen K, Sanchez R, Raven J, Pedersen E, Krintel JJ, Dyrberg V. Comparison of induction with and first hour of recovery from brief propofol and methohexital anaesthesia. *Acta Anaesthesiologica Scandinavica* 1990; **34**: 212–215.
  43. Edelist G. A comparison of propofol and thiopentone as induction agents in outpatient surgery. *Canadian Journal of Anaesthesia* 1987; **34**: 110–116.
  44. Jakobsson J, Oddby E, Rane K. Patient evaluation of four different combinations of intravenous anaesthetics for short outpatient procedures. *Anaesthesia* 1993; **48**: 1005–1007.
  45. Jakobsson J, Rane K. Anaesthesia for short outpatient procedures. A comparison between thiopentone and propofol in combination with fentanyl or alfentanil. *Acta Scandinavica Anaesthesiologica* 1995; **39**: 503–507.
  46. Jones DF. Recovery from day-case anaesthesia: comparison of a further four techniques including use of the new induction agent Diprivan. *British Journal of Anaesthesia* 1982; **54**: 629–633.
  47. Monedero RP, Panadero SA, Garcia-Pedrajas F, Carrera HJ, Catala BJC, Arroyo CJL. Estudio comparativo entre tiopental y propofol en anestésicos de corta duración. *Revista Española Anestesiología y Reanimación* 1991; **38**: 153–155.
  48. Nalda MA, Fernández C, Hernández C, Villalonga A, Valero R. Estudio comparativo de propofol y tiopental sódico en anestésicos de breve duración. *Revista Española Anestesiología y Reanimación* 1991; **38**: 146–148.
  49. Nielsen J, Jenstrup M, Gerdes NU, Rasmussen LS, Fruergaard K, Wiberg-Jørgensen F. Awakening and recovery of simple cognitive and psychomotor functions 2 h after anaesthesia for day-case surgery—total intravenous anaesthesia with propofol-alfentanil versus thiopental-alfentanil. *European Journal of Anaesthesiology* 1991; **8**: 219–227.
  50. Sanders LD, Clyburn PA, Rosen M, Robinson JO. Propofol in short gynaecological procedures. Comparison of recovery over 2 days after anaesthesia with propofol or thiopentone as sole anaesthetic agent. *Anaesthesia* 1991; **46**: 451–455.
  51. Vincent RD, Syrop CH, Van Voorhis BJ, Chestnut DH, Sparks AET, McGrath JM, Choi WW, Bates JN, Penning DH. An evaluation of the effect of anesthetic technique on reproductive success after laparoscopic pronuclear stage transfer. *Anesthesiology* 1995; **82**: 352–358.
  52. Crozier TA, Müller JE, Quittkat D, Sydow M, Wuttke W, Kettler D. Totale intravenöse Anästhesie mit Methohexital-Alfentanil oder Propofol-Alfentanil bei Unterbauchlaparotomien. Klinische Aspekte und Einfluss auf die Stressreaktion. *Anaesthesist* 1994; **43**: 594–606.
  53. Fruergaard K, Jenstrup M, Schierbeck J, Wiberg-Jørgensen F. Total intravenous anaesthesia with propofol or etomidate. *European Journal of Anaesthesiology* 1991; **8**: 385–391.
  54. Kotttila K, Östman PL, Faure E, Apfelbaum JL, Ekdawi M, Roizen MF. Randomized comparison of outcome after propofol-nitrous oxide or enflurane-nitrous oxide anaesthesia in operations of long duration. *Canadian Journal of Anaesthesia* 1989; **36**: 651–657.
  55. Kotttila K, Östman P, Faure E, Apfelbaum JL, Prunskis J, Ekdawi M, Roizen MF. Randomized comparison of recovery after propofol-nitrous oxide versus thiopentone-isoflurane-nitrous oxide anaesthesia in patients undergoing ambulatory surgery. *Acta Anaesthesiologica Scandinavica* 1990; **34**: 400–403.
  56. Randel GI, Levy L, Kothary SP, Pandit SK. Propofol versus thiamylal-enflurane anaesthesia for outpatient laparoscopy. *Journal of Clinical Anesthesia* 1992; **4**: 185–189.
  65. Bassil A, Jabbour-Khoury S, Baraka A. Propofol versus thiopentone for induction of anaesthesia in patients undergoing surgery. *Middle East Journal of Anesthesia* 1989; **10**: 307–314.
  66. Boey WK, Kumar A. Comparison of propofol and thiopentone as induction agents for laparoscopy. *Singapore Medical Journal* 1991; **32**: 150–153.
  67. DeGrood PMRM, Harbers JBM, Van Egmond J, Crul JF. Anaesthesia for laparoscopy. A comparison of five techniques including propofol, etomidate, thiopentone and isoflurane. *Anaesthesia* 1987; **42**: 815–823.
  68. Fredman B, Nathanson MH, Smith I, Wang J, Klein K, White PF. Sevoflurane for outpatient anaesthesia: a comparison with propofol. *Anesthesia and Analgesia* 1995; **81**: 823–828.
  69. Gupta A, Larsen LE, Sjöberg F, Lindh ML, Lenmarken C. Thiopentone or propofol for induction of isoflurane-based anaesthesia for ambulatory surgery? *Acta Anaesthesiologica Scandinavica* 1992; **36**: 670–674.
  70. Heath PJ, Kennedy DJ, Ogg TW, Dundling C, Gilks WR. Which intravenous induction agent for day surgery? *Anaesthesia* 1988; **43**: 365–368.
  71. Huma PO. A comparison of Diprivan and thiopentone when used as induction agents for short surgical procedures. *East African Medical Journal* 1990; **67**: 622–631.
  72. Mirakhor RK. Induction characteristics of propofol in children: comparison with thiopentone. *Anaesthesia* 1988; **43**: 593–598.
  73. Oddby-Muhrbeck E, Jakobsson J, Andersson L, Askergrén J. Postoperative nausea and vomiting. A comparison between intravenous and inhalation anaesthesia in breast surgery. *Acta Anaesthesiologica Scandinavica* 1994; **38**: 52–56.
  74. Piotrowski R, Petrow N. Narkoseeinleitung bei Kindern: Propofol im Vergleich zu Thiopental nach der Prämedikation mit Midazolam. *Anaesthesist* 1990; **39**: 398–405.
  75. Rapp SE, Conahan TJ, Pavlin DJ, Levy WJ, Hautman B, Lecky J, Luke J, Nessly ML. Comparison of desflurane with propofol in outpatients undergoing peripheral orthopedic surgery. *Anesthesia and Analgesia* 1992; **75**: 572–579.
  76. Valanne J, Kotttila K. Comparison of methohexitone and propofol ('Diprivan') for induction of enflurane anaesthesia in outpatients. *Postgraduate Medical Journal* 1985; **61** (Suppl. 3): 138–143.
  77. Wrigley SR, Fairfield JE, Jones RM, Black AE. Induction and recovery characteristics of desflurane in day case patients: A comparison with propofol. *Anaesthesia* 1991; **46**: 615–622.
  78. Hannallah RS, Britton JT, Schafer PG, Patel RI, Norden IM. Propofol anaesthesia in paediatric ambulatory patients: a comparison with thiopentone and halothane. *Canadian Journal of Anaesthesia* 1994; **41**: 12–18.
  79. Lebenbom-Mansour MH, Pandit SK, Kothary SP, Randel GI, Levy L. Desflurane versus propofol anaesthesia: a comparative analysis in outpatients. *Anesthesia and Analgesia* 1993; **76**: 936–941.
  80. Rashid S, Gallant B, Grace M, Jolly DT. Recovery characteristics following induction of anaesthesia with a combination of thiopentone and propofol. *Canadian Journal of Anaesthesia* 1994; **41**: 1166–1171.
  81. Valtonen M, Kanto J, Rosenberg P. Comparison of propofol and thiopentone for induction of anaesthesia for elective Caesarean section. *Anaesthesia* 1989; **44**: 758–762.
  82. Aun CST, Short TG, O'Meara ME, Leung DHY, Rowbottom YM, Oh TE. Recovery after propofol infusion anaesthesia in children: comparison with propofol, thiopentone or halothane induction followed by halothane maintenance. *British Journal of Anaesthesia* 1994; **72**: 554–558.
  83. Ding Y, Fredman B, White PF. Recovery following outpatient anaesthesia: use of enflurane versus propofol. *Journal of Clinical Anesthesia* 1993; **5**: 447–450.
  84. Fahy LT, Van Mourik GA, Utting JE. A comparison of the induction characteristics of thiopentone and propofol (2,6 di-isopropyl phenol). *Anaesthesia* 1985; **40**: 939–944.
  85. O'Toole DP, Milligan KR, Howe JP, McCollum JSC, Dundee JW. A comparison of propofol and methohexitone as induction agents for day case isoflurane anaesthesia. *Anaesthesia* 1987; **42**: 373–376.
  86. Valtonen M, Iisalo E, Kanto J, Tikkanen J. Comparison between propofol and thiopentone for induction of anaesthesia in children. *Anaesthesia* 1988; **43**: 696–699.



87. Van Hemelrijck J, Smith I, White PF. Use of desflurane for outpatient anesthesia. A comparison with propofol and nitrous oxide. *Anesthesiology* 1991; **75**: 197–203.
88. Graham SG, Aitkenhead AR. A comparison between propofol and desflurane anaesthesia for minor gynaecological laparoscopic surgery. *Anaesthesia* 1993; **48**: 471–475.
89. Rolly G, Versichelen L. Comparison of propofol and thiopentone for induction of anaesthesia in premedicated patients. *Anaesthesia* 1985; **40**: 945–948.
90. Wilmot G, Bhimsan N, Rocke DA, Murray WB. Intubation conditions and haemodynamic changes following thiopentone or propofol for early tracheal intubation. *Canadian Journal of Anaesthesia* 1993; **40**: 201–205.
91. Blobner M, Schneek HJ, Felber AR, Goegler S, Feussner H, Jelen-Esselborn S. Vergleichende Untersuchungen der Aufwachphase. Laparoskopische Cholezystektomie nach Isofluran-, Methohexital- und Propofolanästhesie. *Anaesthesist* 1994; **43**: 573–581.
92. Boittiaux P, Morelle G, Krivosic-Horber. Anesthésie pour arthroscopie du genou: propofol versus thiopental et halothane. *Annales Françaises d'Anesthésie et de Réanimation* 1987; **6**: 324–326.
93. De Grood PMRM, Mitsukuri S, Van Egmond J, Rutten JM, Crul JF. Comparison of etomidate and propofol for anaesthesia in microlaryngeal surgery. *Anaesthesia* 1987; **42**: 366–372.
94. Doze VA, Shafer A, White PF. Propofol-nitrous oxide versus thiopental-isoflurane-nitrous oxide for general anesthesia. *Anesthesiology* 1988; **69**: 63–71.
95. Eberhart LHJ, Kumm M, Seeling W. Keine bessere Vigilanz nach Allgemeinanästhesie mit Propofol bei Koloneingriffen. *Anaesthesist* 1994; **43**: 159–167.
96. Hunter SJ, McLaren CAB. Propofol for inpatient dental anaesthesia. A comparison of propofol as a sole anaesthetic agent with thiopentone and halothane for inpatient dental anaesthesia. *Anaesthesia* 1988; **43** (Suppl.): 81–84.
97. Killian A, Hamilton P, Tierney M. Propofol versus thiopental-isoflurane in outpatient surgical procedures. *Canadian Journal of Hospital Pharmacy* 1992; **45**: 139–144.
98. Millar JM, Jewkes CF. Recovery and morbidity after day-case anaesthesia. A comparison of propofol with thiopentone-enflurane with and without alfentanil. *Anaesthesia* 1988; **43**: 738–743.
99. Motsch J, Breitbarth J, Salzmann R, Bach A, Martin E. Kognitive und psychomotorische Leistungsfähigkeit nach Isofluran-, Midazolam/Alfentanil- und Propofol-Anästhesie. Eine vergleichende Untersuchung. *Anaesthesist* 1992; **41**: 185–191.
100. Raeder JC, Misvaer G. Comparison of propofol induction with thiopentone or methohexitone in short outpatient general anaesthesia. *Acta Anaesthesiologica Scandinavica* 1988; **32**: 607–613.
101. Steegers PA, Foster PA. Propofol in intravenous anaesthesia without nitrous oxide. *Anaesthesia* 1988; **43** (Suppl.): 94–97.
102. Werner ME, Bach DE, Newhouse RF. A comparison of propofol with methohexital and isoflurane in two general anesthetic techniques. *Journal of Oral and Maxillofacial Surgery* 1993; **51**: 1076–1079.
103. Bonnet MC, Thomasset R, Hamer M, du Cailard J. Comparaison propofol-méthohexital en chirurgie stomatologique et maxillo-faciale. *Annales Françaises d'Anesthésie et de Réanimation* 1987; **6**: 280–284.
104. Ledderose H, Rester P, Carlsson P, Peter K. Recovery times and side effects after propofol infusion and after isoflurane during ear surgery with additional infiltration anaesthesia. *Anaesthesia* 1988; **43** (Suppl.): 89–91.
105. Martin TM, Nicolson SC, Bargas MS. Propofol anaesthesia reduces emesis and airway obstruction in pediatric outpatients. *Anesthesia and Analgesia* 1993; **76**: 144–148.
106. Puttick N, Rosen M. Propofol induction and maintenance with nitrous oxide in paediatric outpatient dental anaesthesia. A comparison with thiopentone-nitrous oxide-halothane. *Anaesthesia* 1988; **43**: 646–649.
107. Reimer EJ, Montgomery CJ, Bevan JC, Merrick PM, Blackstock D, Popovic V. Propofol anaesthesia reduces early postoperative emesis after paediatric strabismus surgery. *Canadian Journal of Anaesthesia* 1993; **40**: 927–933.
108. Snellen FT, Vanacker B, Van Aken H. Propofol-nitrous oxide versus thiopental sodium isoflurane-nitrous oxide for strabismus surgery in children. *Journal of Clinical Anesthesia* 1993; **5**: 37–41.
109. Baude C, Long D, Chabrol B, Moskovtchenko JF. Propofol versus étomidate en chirurgie urologique de courte durée. *Annales Françaises d'Anesthésie et de Réanimation* 1992; **11**: 12–16.
110. Best N, Traugott F. Comparative evaluation of propofol or methohexitone as the sole anaesthetic agent for microlaryngeal surgery. *Anaesthesia and Intensive Care* 1991; **19**: 50–56.
111. Borgeat A, Popovic V, Meier D, Schwander D. Comparison of propofol and thiopental/halothane for short-duration ENT surgical procedures in children. *Anesthesia and Analgesia* 1990; **71**: 511–515.
112. Doze VA, Westphal LM, White PF. Comparison of propofol with methohexital for outpatient anesthesia. *Anesthesia and Analgesia* 1986; **65**: 1189–1195.
113. Johnston R, Noseworthy T, Anderson B, Konopad E, Grace M. Propofol versus thiopental for outpatient anesthesia. *Anesthesiology* 1987; **67**: 431–433.
114. Kashtan H, Edelist G, Mallon J, Kapala D. Comparative evaluation of propofol and thiopentone for intravenous anaesthesia. *Canadian Journal of Anaesthesia* 1990; **37**: 170–176.
115. Monedero P, Carrascosa F, Garcia-Pedrajas F, Panadero A, Arroyo JL. Tiene ventajas propofol sobre midazolam e isoflurano? Estudio comparativo de dos técnicas de anestesia total intravenosa con midazolam y propofol, y anestesia balanceada con isoflurano. *Revista Española Anestesiología y Reanimación* 1994; **41**: 156–164.
116. Nathan N, Rezzoug A, Dolan P, Bonada G, Feiss P. Propofol en perfusion ou isoflurane en circuit fermé. Etude du coût. *Annales Françaises d'Anesthésie et de Réanimation* 1993; **12**: 571–574.
117. Payen JF, Riondel JP, Denis MJ, Doublier C, Badji R, Arvieux C, Stieglitz P. Comparaison des effets cliniques du propofol et du méthohexital au cours des interruptions volontaires de grossesse. *Annales Françaises d'Anesthésie et de Réanimation* 1987; **6**: 293–296.
118. Sampson IH, Plosker H, Cohen M, Kaplan JA. Comparison of propofol and thiamylal for induction and maintenance of anaesthesia for outpatient surgery. *British Journal of Anaesthesia* 1988; **61**: 707–711.
119. Sung YF, Reiss N, Tillette T. The differential cost of anesthesia and recovery with propofol-nitrous oxide anesthesia versus thiopental sodium-isoflurane-nitrous oxide anesthesia. *Journal of Clinical Anesthesia* 1991; **3**: 391–394.
120. Gregory MA, Gin T, Yau G, Leung RKW, Chan K, Oh TE. Propofol infusion anaesthesia for Caesarean section. *Canadian Journal of Anaesthesia* 1990; **37**: 514–520.
121. Marcillon M, Mérot S, Rives E, Ghariani M, Gard JO, Raucoules M, Maestracci P. Comparaison propanidide-propofol en chirurgie stomatologique de courte ou moyenne durée. *Annales Françaises d'Anesthésie et de Réanimation* 1987; **6**: 285–288.
122. Möllhoff T, Burgard G, Prien T. Übelkeit und Erbrechen nach gynäkologischen Laparaskopien. *Anästhesiologie, Intensivmedizin, Notfallmedizin und Schmerztherapie* 1995; **30**: 23–27.
123. Vuyk J, Hennis PJ, Burm AGL, De Voogt JWH, Spierdijk J. Comparison of midazolam and propofol in combination with alfentanil for total intravenous anesthesia. *Anesthesia and Analgesia* 1990; **71**: 645–650.
124. Delhumeau A, Moreau X, Jacob JP, Granry JC, Nicaise C, Cavellat M. Le propofol en endoscopie urologique chez le sujet âgé. Comparaison avec le méthohexital. *Annales Françaises d'Anesthésie et de Réanimation* 1987; **6**: 313–319.
125. Weir PM, Munro HM, Reynolds PI, Lewis IH, Wilton NCT. Propofol infusion and the incidence of emesis in pediatric outpatient strabismus surgery. *Anesthesia and Analgesia* 1993; **76**: 760–764.
126. Jessop E, Grounds RM, Morgan M, Lumley J. Comparison of infusions of propofol and methohexitone to provide light general anaesthesia during surgery with regional blockade. *British Journal of Anaesthesia* 1985; **57**: 1173–1177.
127. Rutter DV, Morgan M, Lumley J, Owen R. ICI 35868 (Diprivan): a new intravenous induction agent. A comparison with methohexitone. *Anaesthesia* 1980; **35**: 1188–1192.
